# Supplementary figures and images for: In Vivo Distribution and Therapeutic Efficacy of Radioiodine-Labeled pH-Low Insertion Peptide Variant 3 in a Mouse Model of Breast Cancer
Source: Hindawi journal article supplement (doi:10.1155/2022/7456365), 2022-01-01

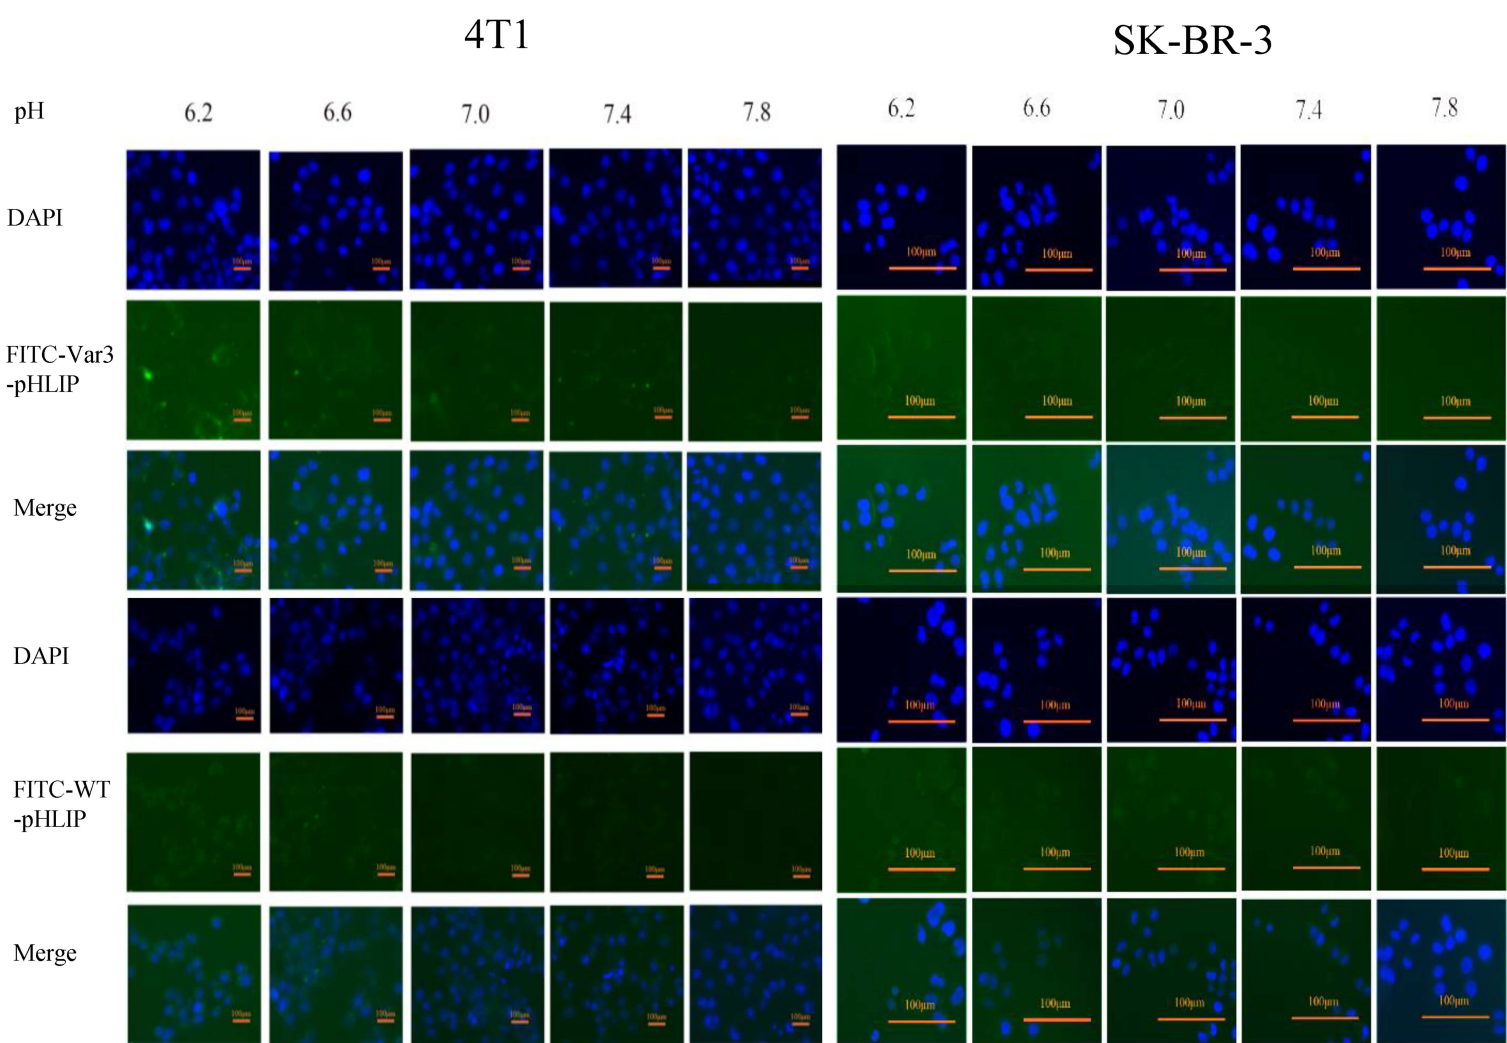

Supplement: f1 [file 7456365.f1.zip]

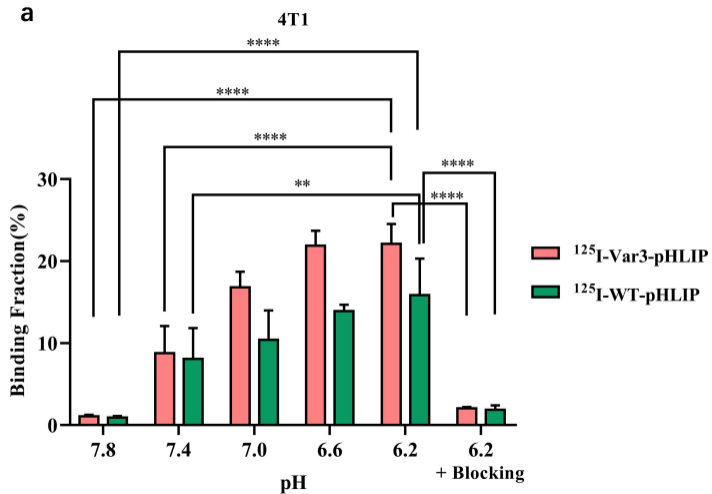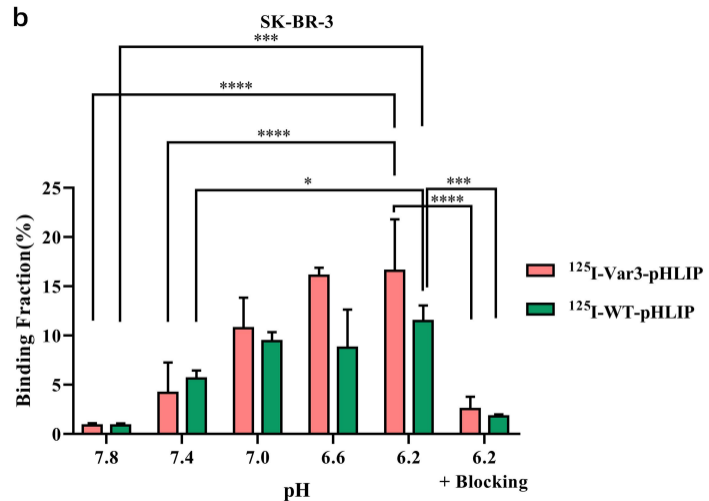

Supplement: f1 [file 7456365.f1.zip]

4T1

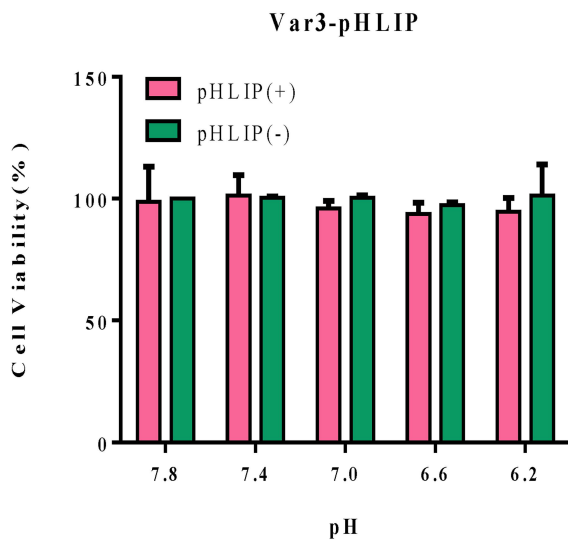

SK-BR-3

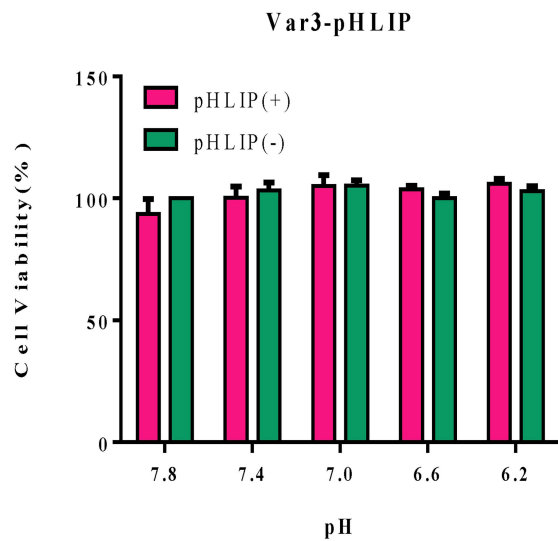

**WT-pHLIP**

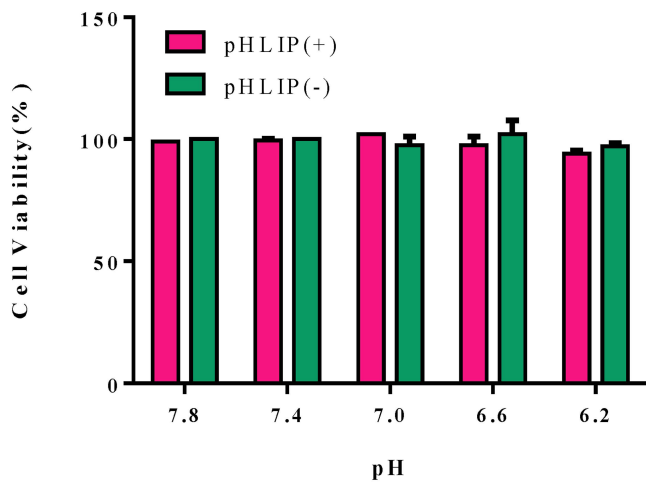

**WT-pHLIP**

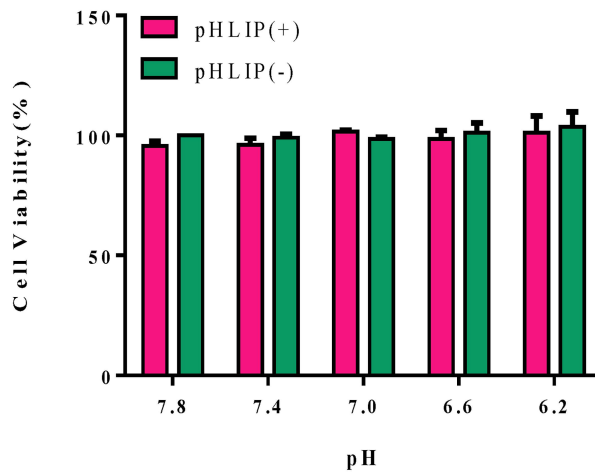

Supplement: f1 [file 7456365.f1.zip]
